# Supplementary material for: ZIF-derived carbon-coated Co9S8 for a silicon anode with superior performance in lithium-ion batteries
Source: Royal Society of Chemistry journal article supplement (doi:10.1039/d4tc00576g), 2024-01-01
Supplement: d4tc00576g1.pdf [file d4tc00576g1.pdf]

## Supporting Information

### ZIF-derived carbon-coated $\text{Co}_9\text{S}_8$ for silicon anode with superior performance in lithium-ion batteries

Xiaojie Sun, Ping Chen\*, Xue Zhou, Ying Liu, Weixiao Dong

State Key Laboratory of Fine Chemicals and School of Chemical Engineering, Dalian University of Technology, Dalian 116024, China

\*Corresponding author.

E-mail address: [chenping\\_898@126.com](mailto:chenping_898@126.com)(P. Chen)

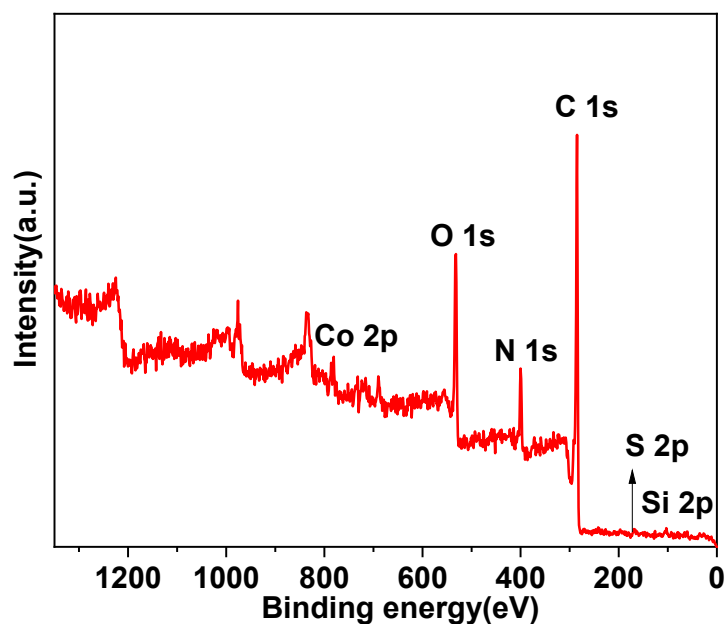

Fig. s1 XPS survey spectrum of Si@void@C@Co<sub>9</sub>S<sub>8</sub>@C

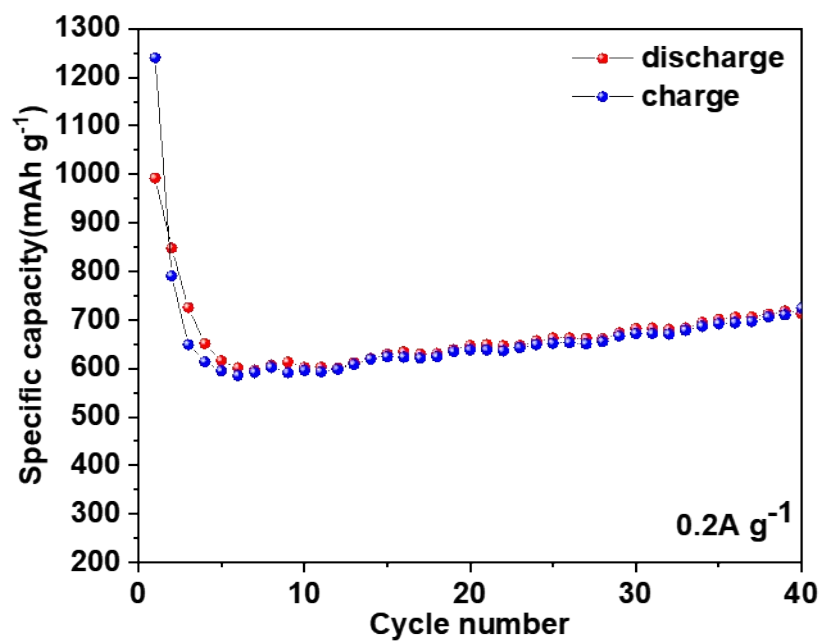

Fig. s2 cycling performance of Si@void@C@Co<sub>9</sub>S<sub>8</sub>@C at 0.2A g<sup>-1</sup>

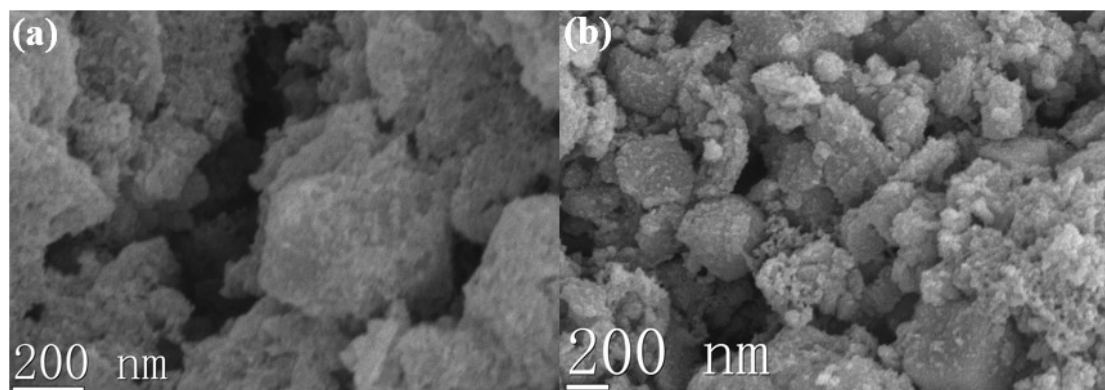

Fig. s3 a,b SEM images of Si@void@C@Co<sub>9</sub>S<sub>8</sub>@C after 400cycles at 1.0A g<sup>-1</sup>

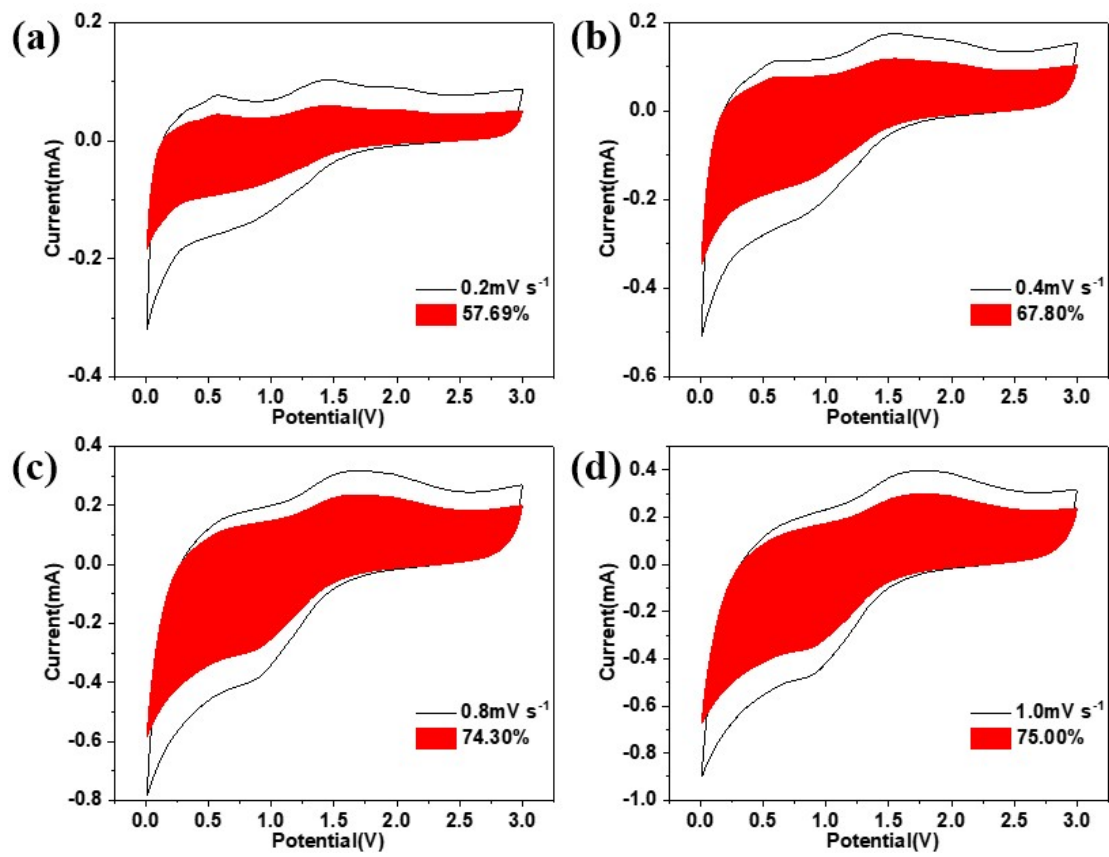

**Fig. s4** the contribution of pseudocapacitance at the scan rate of **a**  $0.2\text{mV s}^{-1}$ , **b**  $0.4\text{mV s}^{-1}$ , **c**  $0.8\text{mV s}^{-1}$ , **d**  $1.0\text{mV s}^{-1}$

**Table s1** Comparison of performance of other Si-C and Co<sub>9</sub>S<sub>8</sub> materials for lithium-ion batteries

| Anode                                       | Current Density(A g <sup>-1</sup> ) | Discharge Capacity(mAh g <sup>-1</sup> ) | Cycle Number | Ref.      |
|---------------------------------------------|-------------------------------------|------------------------------------------|--------------|-----------|
| Si@void@C@Co <sub>9</sub> S <sub>8</sub> @C | 1.0                                 | 658.1                                    | 500          | this work |
| Si@void@C@Co <sub>9</sub> S <sub>8</sub> @C | 0.2                                 | 713.1                                    | 40           | this work |
| yolk-shell Si@void@C                        | 0.05                                | 628                                      | 100          | [8]       |
| porous Si-C                                 | 0.2                                 | 530                                      | 100          | [9]       |
| hollow core-shell Si@C                      | 0.1                                 | 767                                      | 100          | [11]      |
| Co <sub>9</sub> S <sub>8</sub> /C           | 1.0                                 | 680                                      | 700          | [12]      |
| Co <sub>9</sub> S <sub>8</sub> @C           | 0.5                                 | 406.5                                    | 100          | [13]      |
| H-Co <sub>9</sub> S <sub>8</sub> +MWCNTs    | 0.3                                 | 511.3                                    | 50           | [14]      |
| CoSx/CP                                     | 0.5                                 | 562                                      | 300          | [15]      |
| Si@C@void@C                                 | 0.2                                 | 710                                      | 100          | [25]      |
| Co <sub>9</sub> S <sub>8</sub> /C-T         | 0.2                                 | 709                                      | 150          | [54]      |

**Table s2** Kinetic parameters of Si@void@C@Co<sub>9</sub>S<sub>8</sub>@C and Si@void@C

| Sample                                      |        | Rs(Ω) | Rct(Ω) | Wo(Ω) |
|---------------------------------------------|--------|-------|--------|-------|
| Si@void@C@Co <sub>9</sub> S <sub>8</sub> @C | before | 8.30  | 127.6  | 75.3  |
|                                             | after  |       | 147.9  | 619.5 |
| Si@void@C                                   | before |       | 142    | 84.63 |
|                                             | after  |       | 179.8  | 420.6 |

## References

1. X. J. Xu, J. Liu, J. W. Liu, L. Z. Ouyang, R. Z. Hu, H. Wang, L. C. Yang and M. Zhu, *Adv. Funct. Mater.*, 2018, **28**, 12.
2. X. J. Xu, F. K. Li, D. C. Zhang, Z. B. Liu, S. Y. Zuo, Z. Y. Zeng and J. Liu, *Adv. Sci.*, 2022, **9**, 11.
3. J. Liu, P. Kopold, P. A. van Aken, J. Maier and Y. Yu, *Angew. Chem.-Int. Edit.*, 2015, **127**, 9768-9772.
4. J. Liu, C. Wu, D. Xiao, P. Kopold, L. Gu, P. A. van Aken, J. Maier and Y. Yu, *Small*, 2016, **12**, 2354-2364.
5. H. Mi, X. Yang, Y. Li, P. Zhang and L. Sun, *Chem. Eng. J.*, 2018, **351**, 103-109.
6. L. Sun, Y. Liu, R. Shao, J. Wu, R. Jiang and Z. Jin, *Energy Storage Mater.*, 2022, **46**, 482-502.
7. J. Xie, L. Sun, Y. Liu, X. Xi, R. Chen and Z. Jin, *Nano Res.*, 2022, **15**, 395-400.
8. S. J. Yeom, C. Lee, S. Kang, T.-U. Wi, C. Lee, S. Chae, J. Cho, D. O. Shin, J. Ryu and H.-W. Lee, *Nano Lett.*, 2019, **19**, 8793-8800.
9. L. Sun, F. Wang, T. Su and H.-B. Du, *Dalton Transactions*, 2017, **46**, 11542-11546.
10. L. Sun, J. Xie, S. Huang, Y. Liu, L. Zhang, J. Wu and Z. Jin, *Sci. China Mater.*, 2022, **65**, 51-58.
11. L. Sun, X. Jiang and Z. Jin, *Chem. Eng. J.*, 2023, **474**, 145960.
